# Supplementary material
Source: Springer Nature journal article supplement (https://www.springermedizin.de/resource/supplementary/12887_2012_744_MOESM2_ESM.pdf/9475870)
Supplement: MOESM2 [file 9475870]

# Comprehensive Care Plan

(Insert institution name here)

PATIENT NAME

DOB: (patient's date of birth)

MR #:

Primary Insurance:

Secondary Insurance:

Parent/Guardian Name(s)

Street Address

City, Province/State

Home telephone number(s)

Mobile telephone number(s)

Work telephone number(s)

Current photograph  
of child when well

**Primary Diagnosis:** (List primary diagnosis)

**Secondary Diagnoses:** (List secondary diagnoses)

- 1.
- 2.
- 3.

**Alerts:**CPR STATUS and allergies

**Description of child (2-3 lines):** Developmental milestones, communication, likes/dislikes

**Important Family Information (2-3 lines):** Relevant information about family constellation, child custody etc.

**Most Involved Health Care Providers/Emergency and Medical Contacts:**

List up to a maximum of 3 (all other care providers are listed at end of care plan)

| Name | Role                                                                                                                                 | Contact Information                       |
|------|--------------------------------------------------------------------------------------------------------------------------------------|-------------------------------------------|
|      | e.g. pediatrician/nurse/allied health care provider who best knows this patient and their contact information should be listed here. | Address:<br>Telephone:<br>Fax:<br>E-mail: |

**Current Daily Medications**Scheduled/PRN/Complementary or Alternative Medications

**Weight (Date recorded):**

| Medication | Dose | Route | Schedule | Specific Information                                |
|------------|------|-------|----------|-----------------------------------------------------|
|            |      |       |          | Include preparation/<br>reconstitution instructions |

**EMERGENCY MANAGEMENT GUIDELINES:** (This section includes information related to presentation and treatment when the child presents to the ED)

| Common Presentation                                                                                                 | Approach to Work-up                                                                | Approach to Treatment                                                              |
|---------------------------------------------------------------------------------------------------------------------|------------------------------------------------------------------------------------|------------------------------------------------------------------------------------|
| A succinct list of presenting signs can include presenting diagnoses, physical examination relevant for the patient | An approach for work-up should be presented here especially if not common practice | An approach to treatment should then be outlined especially if not common practice |

**Detailed Information about Patient's Medical History (review of systems)**

| BODY SYSTEM | Diagnoses                         | Presentations, Relevant Tests, and Common Treatments                         |
|-------------|-----------------------------------|------------------------------------------------------------------------------|
| NEUROLOGY   | List Relevant Diagnoses<br>•<br>• | List common presentations, relevant tests<br>e.g. MRI, and common treatments |
| HEENT       | List Relevant Diagnoses<br>•<br>• | List common presentations, relevant tests<br>e.g. MRI, and common treatments |

**DIET/NUTRITION**

Type (oral, enteral, parenteral):

Description:

**TECHNOLOGY**

| Type               | Details                                                                                                                                                                                                               |
|--------------------|-----------------------------------------------------------------------------------------------------------------------------------------------------------------------------------------------------------------------|
| Respiratory        | oxygen (how it is administered and settings); tracheostomy (kind, size, notes); ventilation (invasive vs non-invasive, settings); suction (catheter size, kind of suctioning required); nebulizer (treatments needed) |
| IV Access          | PORT (insertion date, issues); PICC (insertion date, issues); CVL (insertion date, issues)                                                                                                                            |
| Nutrition          | enteral feed tube (kind, route, size)                                                                                                                                                                                 |
| Mobility equipment | wheelchair; walker; stander; AFO's                                                                                                                                                                                    |
| Other              |                                                                                                                                                                                                                       |

**Hospitalizations:**

| Date of admission | Date of discharge | Main Issues                        |
|-------------------|-------------------|------------------------------------|
| DD/MM/YYYY        | DD/MM/YYYY        | Main issues during hospitalization |

**Glossary of Medical Terms:**

| Term | Definition |
|------|------------|
|      |            |

**List of health care providers & Locations of Care:**

| Name | Role                                                                                                                                                                                                                                                                                       | Contact Information                       |
|------|--------------------------------------------------------------------------------------------------------------------------------------------------------------------------------------------------------------------------------------------------------------------------------------------|-------------------------------------------|
|      | e.g. Physician/Sub-Specialty; Nurse Practitioner/Sub-Specialty; Home Care Nurse; Clinic Nurse/Sub-Specialty; School Nurse; Dietician Social Worker; Physiotherapist; Occupational Therapist; Speech/Language Pathologist; Pharmacist; Durable medical equipment suppliers; School; Daycare | Address:<br>Telephone:<br>Fax:<br>E-mail: |
